# Supplementary material for: Theoretical study of CDW phases for bulk NbX2 (X = S and Se)
Source: Royal Society of Chemistry journal article supplement (doi:10.1039/d3cp04426b), 2024-01-01
Supplement: d3cp04426b1.pdf [file d3cp04426b1.pdf]

## Supporting Information

# Theoretical Study of CDW phases for bulk $\text{NbX}_2$ (X= S and Se)

Hongwei Du<sup>1</sup>, Zhenyi Jiang<sup>1\*</sup>, Jiming Zheng<sup>1\*</sup>, Xiaodong Zhang<sup>1</sup>, Wenxuan Wang<sup>1</sup>, Zhiyong Zhang<sup>2</sup>

<sup>1</sup>Shaanxi Key Laboratory for Theoretical Physics Frontiers, Institute of Modern Physics, Northwest University, Xi'an 710069

<sup>2</sup>Stanford Research Computing Center, Stanford University, Stanford, CA 94305, United States

## Section 1: Figure and Table

Table S-1 Lattice constants ( $\text{\AA}$ ) of bulk 2H-NbX<sub>2</sub> (X= S and Se) with various vdW corrections.

|            | No-vdW(S/Se)   | D3(S/Se)        | optB88b(S/Se)   | optB86b(S/Se)   | Exp(S/Se) [1,2] | Exp(S/Se) [3,4] |
|------------|----------------|-----------------|-----------------|-----------------|-----------------|-----------------|
| <i>a</i>   | 3.438 / 3.474  | 3.320 / 3.449   | 3.353 / 3.485   | 3.325 / 3.455   | 3.310 / 3.443   | 3.418 / 3.449   |
| <i>c</i>   | 13.227/ 13.932 | 11.773 / 12.303 | 12.011 / 12.646 | 11.816 / 12.501 | 11.890 / 12.547 | 11.860 / 12.546 |
| <i>c/a</i> | 3.847 / 4.010  | 3.546 / 3.567   | 3.582 / 3.629   | 3.554 / 3.618   | 3.592 / 3.644   | 3.470 / 3.638   |

Table S-2 Formation energies  $\Delta E_{\text{CDW}}$  (meV/CDW) of CDW configurations (Nb<sub>9</sub>X<sub>18</sub>) for bulk 1H-NbX<sub>2</sub> (X= S and Se) with PBE, PBE+D3, and PBE+optB86b corrections.

| Configuration | PBE(S/Se)<br>(meV/CDW) | PBE+D3(S/Se)<br>(meV/CDW) | PBE+optB86b(S/Se)<br>(meV/CDW) |
|---------------|------------------------|---------------------------|--------------------------------|
| T             | -26 / -36              | -26 / -42                 | -29 / -45                      |
| Ts            | -23 / -29              | -24 / -39                 | -27 / -36                      |
| H             | -19 / -25              | -21 / -28                 | -24 / -32                      |
| S             | -18 / -17              | -19 / -22                 | -22 / -23                      |

Table S-3 Lattice parameters ( $\text{\AA}$ /  $\text{\AA}^3$ ), total energy without vdW correction, and vdW of CDW and metal phase with the same number of atoms for bulk 2H-NbX<sub>2</sub> (X = S and Se)

|                         | <i>a</i> | <i>b</i> | <i>c</i> | <i>V</i> | <i>E</i> | <i>E</i> <sub>vdW</sub> |
|-------------------------|----------|----------|----------|----------|----------|-------------------------|
| Metal/NbS <sub>2</sub>  | 10.021   | 10.021   | 11.996   | 1143.321 | -292.314 | 57.981                  |
| TC/NbS <sub>2</sub>     | 10.031   | 10.031   | 11.999   | 1145.666 | -292.340 | 57.980                  |
| Metal/NbSe <sub>2</sub> | 10.409   | 10.409   | 12.613   | 1183.352 | -254.601 | 62.016                  |
| TTs/NbSe <sub>2</sub>   | 10.411   | 10.411   | 12.616   | 1188.573 | -254.652 | 62.015                  |

Table S-4 Geometrical parameters ( $\text{\AA}$ ) of CDW and metal phase for bulk 2H-NbS<sub>2</sub> and 2H-NbSe<sub>2</sub>

|                         | $d_1$ | $d_2$ | $d_3$ | $d_4$ | $d_5$ | $d_6$ |
|-------------------------|-------|-------|-------|-------|-------|-------|
| Metal/NbS <sub>2</sub>  | 1.576 | 1.576 | 2.846 | 1.576 | 1.576 | 5.998 |
| CDW/NbS <sub>2</sub>    | 1.575 | 1.575 | 2.850 | 1.574 | 1.574 | 5.999 |
| Metal/NbSe <sub>2</sub> | 1.691 | 1.691 | 2.924 | 1.691 | 1.691 | 6.306 |
| CDW/NbSe <sub>2</sub>   | 1.691 | 1.691 | 2.927 | 1.690 | 1.690 | 6.308 |

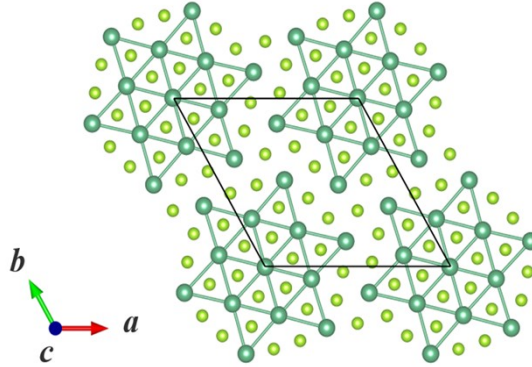

Figure S-1 CDW configuration of monolayer 1T-NbSe<sub>2</sub> with a vacuum layer of 20  $\text{\AA}$ .

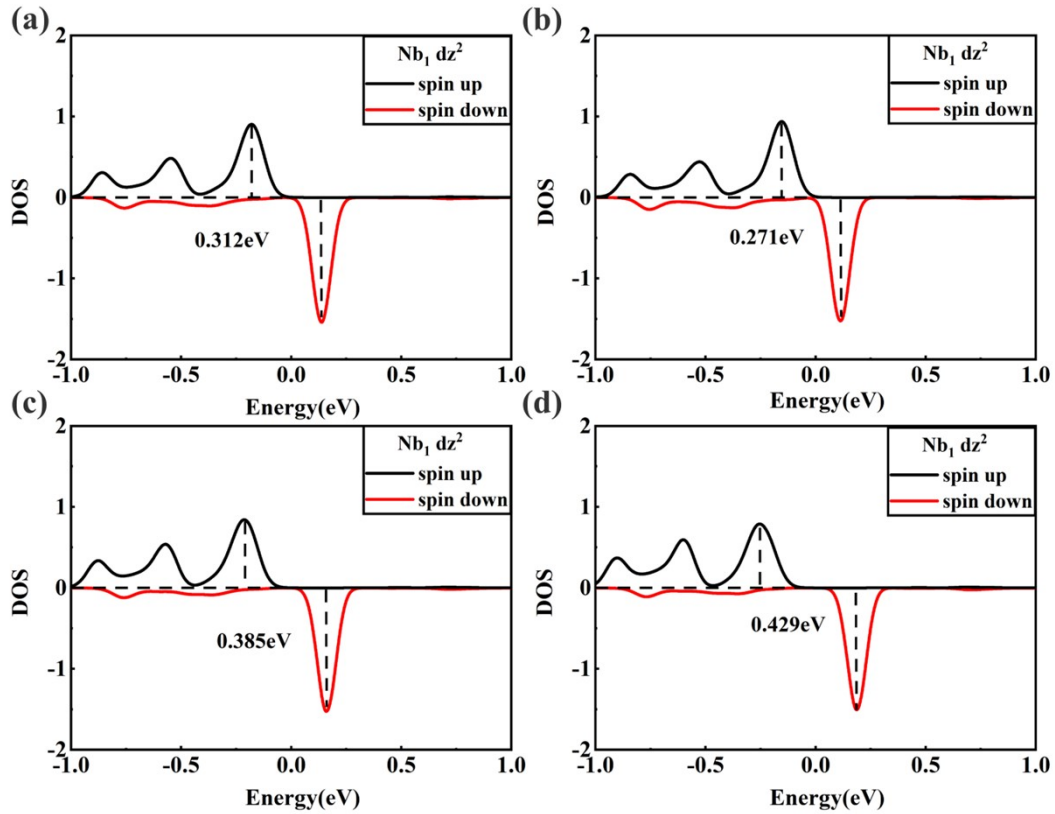

Figure S-2 Motto band gap of CDW configuration of mono-layer 1T-NbSe<sub>2</sub> at various  $U$  values. (a)  $U = 1$  eV, (b)  $U = 1.5$  eV, (c)  $U = 2.0$  eV, (d)  $U = 2.5$  eV

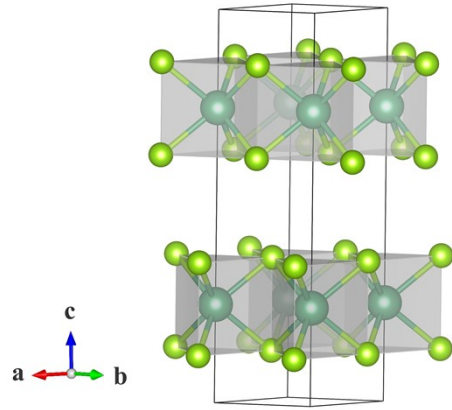

Figure S-3 Crystal structure of 2H-NbX<sub>2</sub> (X= S and Se) bulk. Nb and Se atoms are respectively drawn by dark green and light green balls.

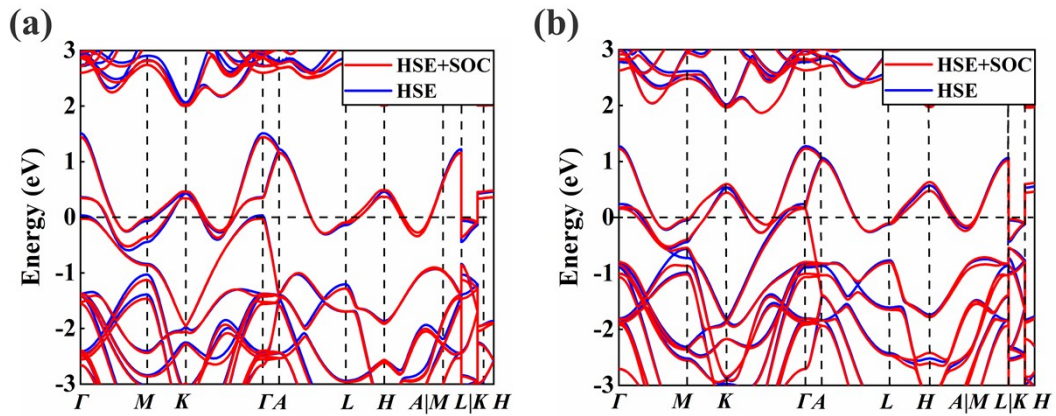

Figure S-4 Energy band of bulk (a) 2H-NbS<sub>2</sub> and (b) 2H-NbSe<sub>2</sub>. Blue and red lines represent the HSE band without and with SOC calculations, respectively.

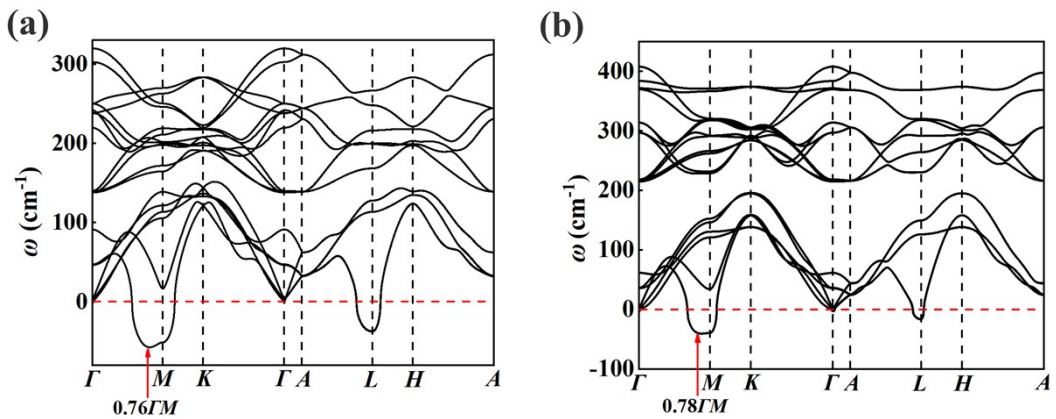

Figure S-5 Phonon dispersion of bulk (a) 2H-NbS<sub>2</sub> and (b) 2H-NbSe<sub>2</sub>.

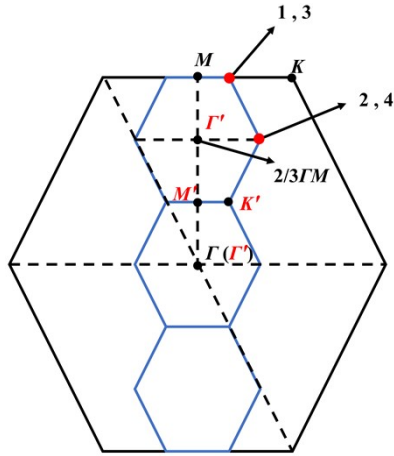

Figure S-6 Brillouin zone of hexagonal  $\text{NbX}_2$  ( $X = \text{S}$  and  $\text{Se}$ ) lattice. The black line represents the undistorted primitive unit cell and blue line represents the unit cell of CDW phase.

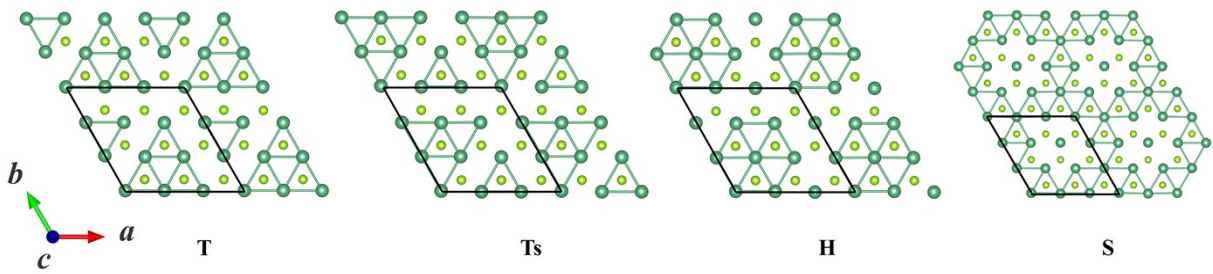

Figure S-7 CDW configurations for mono-layer  $1\text{H-NbX}_2$  ( $X = \text{S}$  and  $\text{Se}$ ) with a vacuum layer of  $20 \text{ \AA}$ .

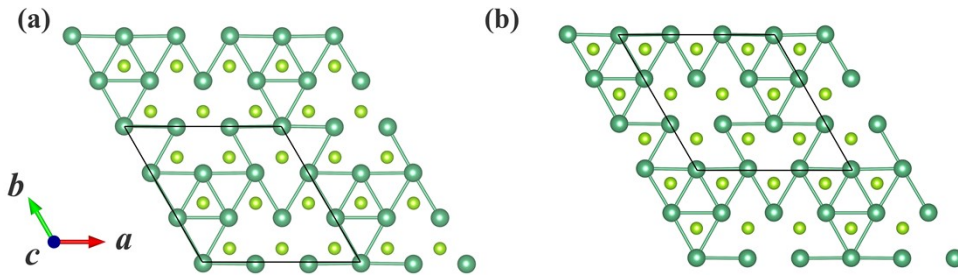

Figure S-8 C (a) and T' (b) monolayer configuration in the TC bilayer structure for bulk  $2\text{H-NbS}_2$ .

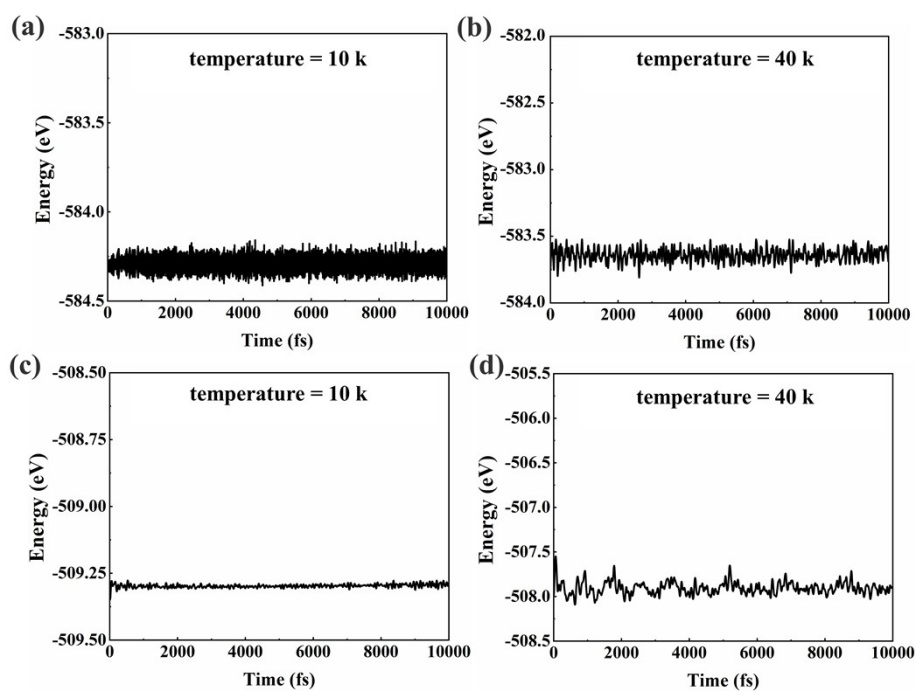

Figure S-9 Molecular dynamics simulation with NVT ensemble. (a-b) TC configuration at 10 K and 40 K for 2H-NbS<sub>2</sub>, respectively; (c-d) TTs configuration at 10 K and 40 K for 2H-NbSe<sub>2</sub>, respectively.

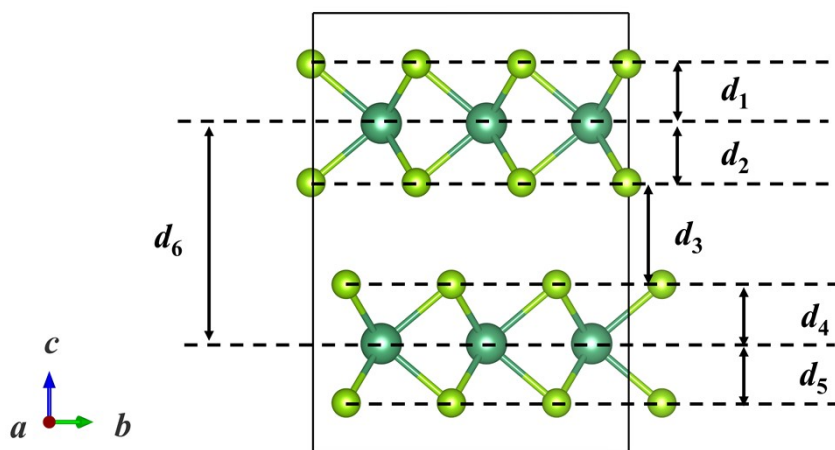

Figure S-10 Schematic diagram of atomic separation of CDW and metal phase for bulk 2H-NbX<sub>2</sub>

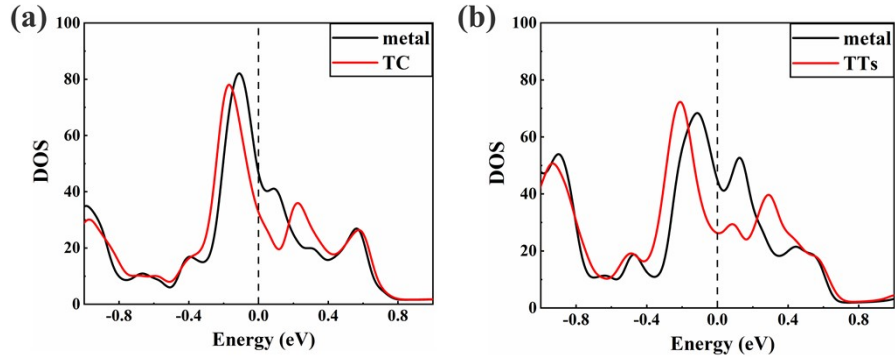

Figure S-11 (a) In-plane DOS of TC configuration and metal phase of bulk 2H-NbSe<sub>2</sub>. (b) In-plane DOS of TTs configuration and metal phase of bulk 2H-NbSe<sub>2</sub>.

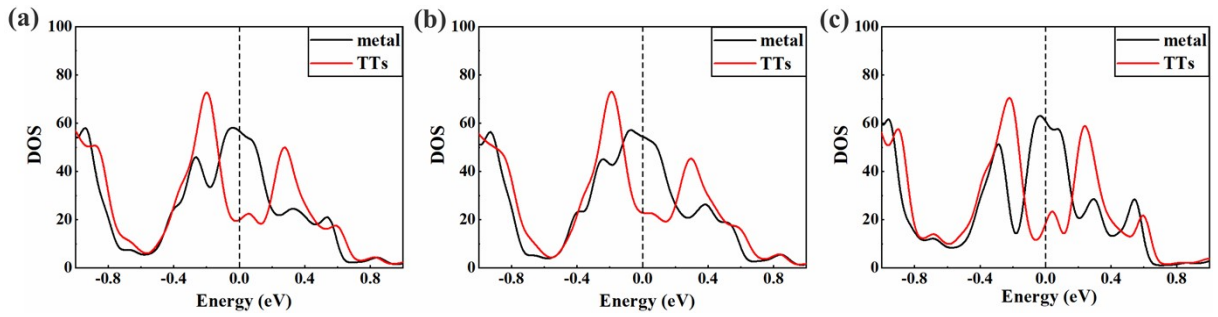

Figure S-12 DOS without vdW interaction for CDW and metal phases of bulk 2H-NbSe<sub>2</sub>, (a) Total DOS. (b) In-plane DOS. (c) Out-of-plane DOS.

## Section 2: Two-band model Theory

Density of states (DOS) is essentially the number of different states that electrons are allowed to occupy at a specific energy level, that is, the number of electronic states per unit energy and unit volume. The bulk properties of conductive solids, such as specific heat, paramagnetic susceptibility, and other transport phenomena, depend on this function. The dispersion relationship between the two energy bands in a semimetal is as follows:

$$E_1(k) = E_1(k_{10}) - \frac{\hbar^2(k - k_{10})^2}{2m_1}, \quad E_2(k) = E_2(k_{20}) + \frac{\hbar^2(k - k_{20})^2}{2m_2}$$

$E_1(k_{10})$  is the top of the first band,  $E_2(k_{20})$  is the bottom of the second band, and  $m_1$  and  $m_2$  are the effective masses of the two bands. For band 1:

$$Z_1(E) = \frac{2V}{(2\pi)^3} \int \frac{dS}{|\nabla_k E|} = \frac{2V}{(2\pi)^3} \frac{4\pi k^2}{\hbar \sqrt{2[E_1(k_{10}) - E_1(k)]/m_1}} = \frac{2V}{(2\pi)^2} \left(\frac{2m_1}{\hbar^2}\right)^{3/2} \sqrt{E_1(k_{10}) - E_1(k)}$$

In the same way

$$Z_2(E) = \frac{2V}{(2\pi)^2} \left(\frac{2m_2}{\hbar^2}\right)^{3/2} [E_2(k) - E_2(k_{20})]^{1/2}$$

In the calculation, we are more concerned about the change of the average number of electrons with energy, that is, the number of electrons in a unit volume per unit energy. According to the Fermi-Dirac distribution function, we can directly write the statistical electron number

$$f(E)Z(E)dE$$

$f(E)Z(E)$  specifically summarizes the statistical distribution of electrons in the system according to energy, which depends on the Fermi statistical distribution  $f(E)$  and the density of states  $Z(E)$  as shown in Figure S-13.

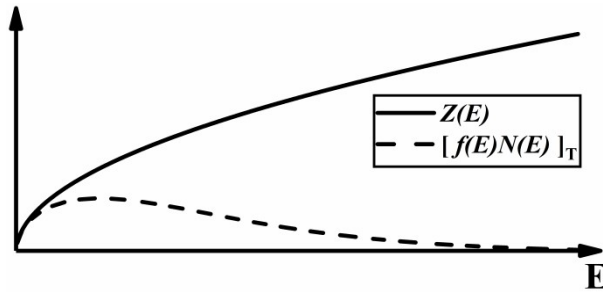

Figure S-13 Free electron density of states (solid line) and electron distribution according to energy (dashed line)

When there are two energy bands with different effective masses in the semimetal, where  $m_1 < m_2$ , so the energy band 2 is smoother than the energy band 1. If these two energy bands are located in the position of Figure S-14(a), Figure S-14(b) shows the relationship between the DOS of the two energy bands. If only energy band 1 crosses through the Fermi surface, it means that the valence band crosses through the Fermi surface  $E_{F1}$ . Part of the electrons in band 1 will transfer to band 2, forming holes in band 1, causing the material to be hole-conducting. If only energy band 2 passes through the Fermi surface  $E_{F2}$ , it means that the conduction band has crossed through the Fermi surface, and the unfilled energy level in the conduction band can accommodate more electrons, which is considered to be electronic conduction. In the Figure S-14, the electronic occupation of energy band 2 is stronger than that of energy band 1, which is the result of the change of energy band slope owing to the difference in

effective mass. When two energy bands cross through the Fermi level at the same time as shown in Figure S-14(b), there is both electron conduction and hole conduction in the material. At this time, it is very important to judge whether the material is specifically electrons or holes as carriers. The bulge in Figure S-14(b) is due to the overlap of electrons in the two energy bands. When the Fermi level is located at the bulge  $E_{F1}$ , it means that the two energy bands have crossed through the Fermi level. We can observe that the bulge is not symmetrical, and the highest point is more inclined to the place with higher energy. This is because the rising trend of the electron occupation that provides the hole conduction band is greater than the rising trend of the DOS that provides the electron conduction band. Therefore, if the Fermi surface ( $E_{F1}$ ) is close to the hole energy band, that is, the right side of the bulge (at this time, the slope occupied by electrons is negative value) and  $d(\text{DOS})/dE < 0$ , it can be determined that holes are more competitive than electrons, and vice versa.

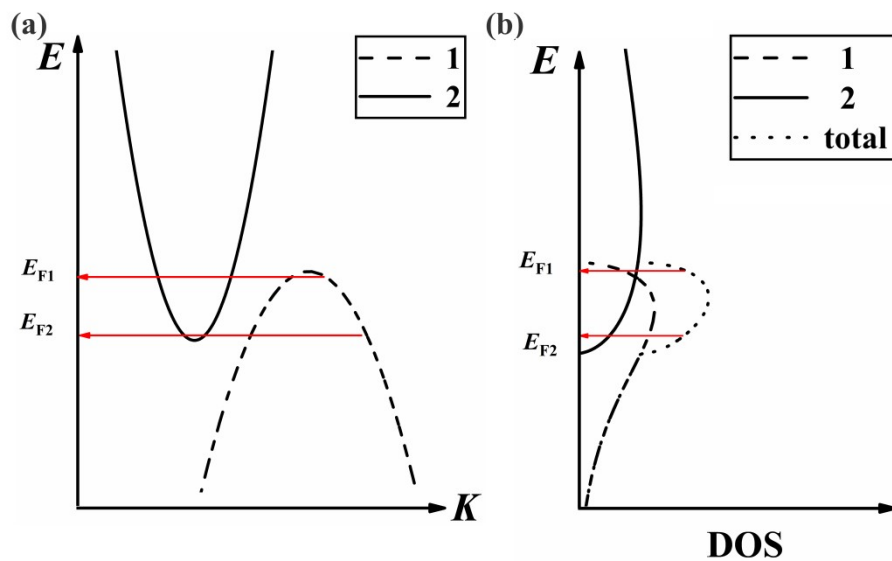

Figure S-14(a) Model of two energy bands in the semimetal. (b) Slope of DOS when Fermi level locate at the top of valence band ( $E_{F2}$ ) or bottom of conduction band ( $E_{F1}$ ).

## REFERENCE

- [1] A. Meerschaut, C. Deudon, Crystal structure studies of the  $3R\text{-Nb}_{1.09}\text{S}_2$  and the  $2H\text{-NbSe}_2$  compounds: correlation between nonstoichiometry and stacking type (= polytypism), *Materials Research Bulletin*, 36 (2001) 1721-1727.
- [2] F. Jellinek, G. Brauer, H. MÜLLER, Molybdenum and Niobium Sulphides, *Nature*, 185 (1960) 376-377.
- [3] S. F. Meyer, R. E. Howard, G. R. Stewart, J. V. Acrivos, T. H. Geballe, Properties of intercalated  $2H\text{-NbSe}_2$ ,  $4Hb\text{-TaS}_2$ , and  $1T\text{-TaS}_2$  *The Journal of Chemical Physics*, 62 (2008) 4411-4419.
- [4] C. J. Carmalt, T. D. Manning, I. P. Parkin, E. S. Peters, A. L. Hector, Formation of a new (1T) trigonal  $\text{NbS}_2$  polytype via atmospheric pressure chemical vapour deposition, *Journal of Materials Chemistry*, 14 (2004) 290-291.
